# Supplementary material for: Enhanced removal of heavy metals from electroplating wastewater through electrocoagulation using carboxymethyl chitosan as corrosion inhibitor for steel anode
Source: Royal Society of Chemistry journal article supplement (doi:10.1039/c8ew00322j), 2018-01-01
Supplement: c8ew00322j1.pdf [file c8ew00322j1.pdf]

**Enhanced removal of heavy metals from electroplating wastewater through  
electrocoagulation using carboxymethyl chitosan as corrosion inhibitor for steel anode**

Hao Sun<sup>a</sup>, Han Wang<sup>a, b</sup>, He Wang<sup>a</sup>, Qun Yan<sup>a, b, c\*</sup>

<sup>a</sup> School of Environmental and Civil Engineering, Jiang nan University, Wuxi 214122, China

<sup>b</sup> Jiangsu Key Laboratory of Anaerobic Biotechnology, Wuxi 214122, China

<sup>c</sup> Jiangsu Collaborative Innovation Center of Technology and Material of Water Treatment, Suzhou  
215011, China

\* Corresponding author, Tel.: +86-510-85197872. E-mail: yanqun@jiangnan.edu.cn (Q. Yan)

### **1. Concentration of different compounds on the inhibited anode surface**

Values of the binding energy and the area percentage for the contributions to each signal were shown in Table 1S. Then the concentration of different compounds on the inhibited anode surface was calculated according to:

$$C_i = \frac{\frac{I_{(i)}}{SF_i}}{\left[ \frac{I(C_{1s})}{SFC_{1s}} + \frac{I(Fe_{2p})}{SFFe_{2p}} + \frac{I(O_{1s})}{SFO_{1s}} \right]}$$

where  $I$  and  $SF$  represent the intensity of signals and sensitive factors (that is, 0.278 for C, 2.957 for Fe and 0.78 for O).

Table 1S. BE values, intensity of signals and the area percentage for the contributions to each signal.

| XPS peaks |                                | Binding energy /<br>eV | Intensity of signals | Area percentage for the<br>contributions to each signal<br>(%) |
|-----------|--------------------------------|------------------------|----------------------|----------------------------------------------------------------|
| C 1s      | COO <sup>-</sup>               | 288.2                  | 2026.37              | 36.39                                                          |
|           | C=N                            | 286.5                  | 30.38                | 0.55                                                           |
|           | C-C                            | 284.2                  | 2606.83              | 46.81                                                          |
|           | C-COO                          | 285.6                  | 904.68               | 16.25                                                          |
| Fe 2p     | Fe-N                           | 707.1                  | 106.98               | 0.67                                                           |
|           | COO-Fe                         | 712.9                  | 3139.76              | 19.75                                                          |
|           | FeO                            | 709.8                  | 12650.77             | 79.58                                                          |
| O 1s      | FeO                            | 530.9                  | 7675.13              | 79.57                                                          |
|           | COO-Fe                         | 532.4                  | 128.11               | 1.33                                                           |
|           | Fe <sub>3</sub> O <sub>4</sub> | 530.0                  | 1842.82              | 19.10                                                          |

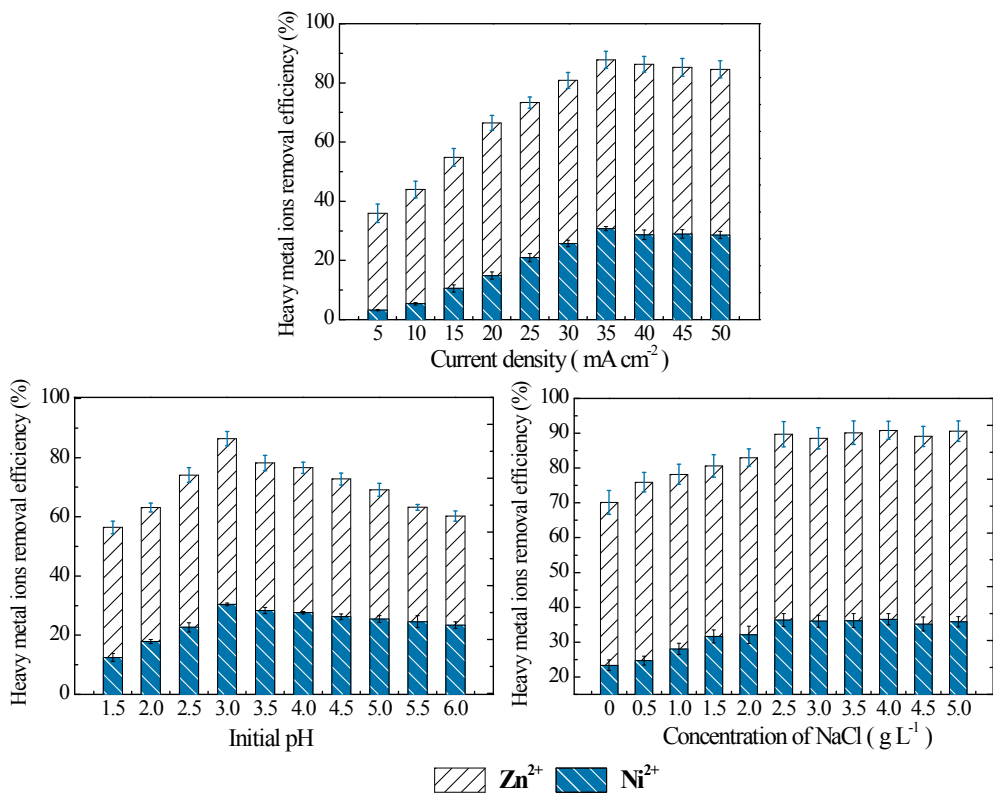

Fig 1S. The effect of the current density, initial pH and the concentration of NaCl on heavy metal ions removal efficiency of the control.
